# Supplementary material for: Redox-triggered intracellular dePEGylation based on diselenide-linked polycations for DNA delivery
Source: Royal Society of Chemistry journal article supplement (doi:10.1039/c3tb21241f), 2013-01-01
Supplement: c3tb21241f.pdf [file c3tb21241f.pdf]

## Electronic Supplementary Information

### **Redox-triggered intracellular dePEGylation based on diselenide-linked polycations for DNA delivery†**

**Wenyu Li, Peng Zhang, Kun Zheng, Qiaoling Hu, and Youxiang Wang\***

MOE key Laboratory of Macromolecular Synthesis and Functionalization,  
Department of Polymer Science and Engineering, Zhejiang University, Hangzhou  
310027, P. R. China. Tel. /fax: +86 571 87953729; E-mail address:  
yx\_wang@zju.edu.cn

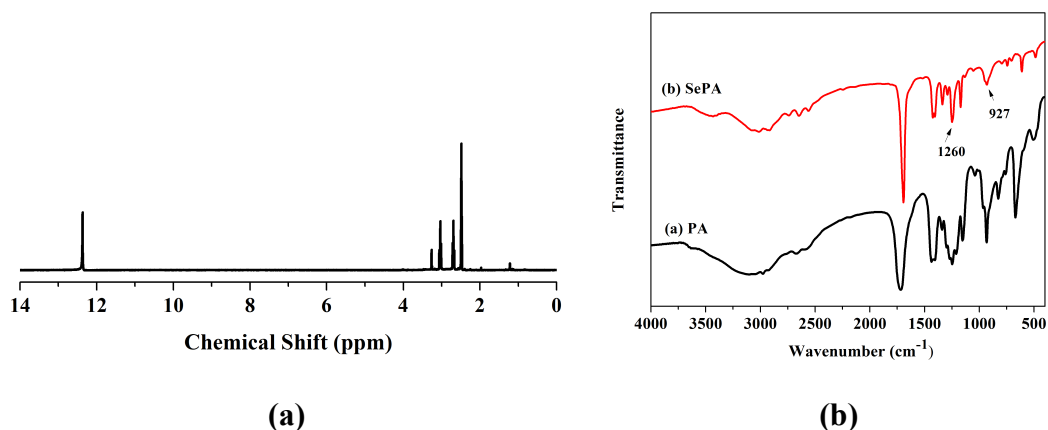

Fig. S1 The  $^1\text{H}$  NMR (a) in  $\text{DMSO-d}_6$  and FT-IR (b) spectrum of SePA.

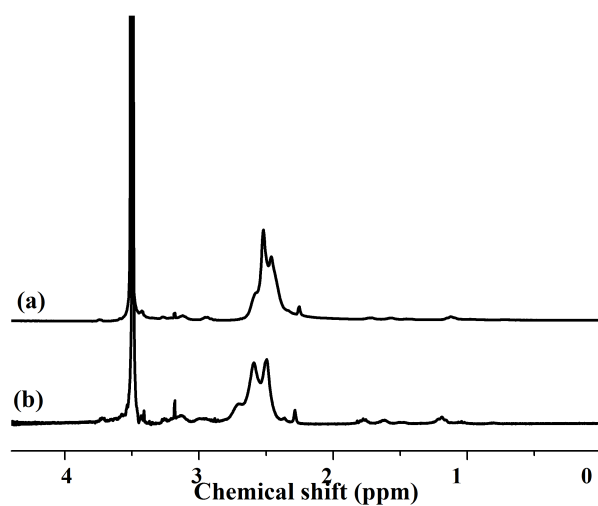

Fig. S2 The  $^1\text{H}$  NMR spectrum of mPEG-SS-PEI (a) and mPEG-PEI (b) in  $\text{D}_2\text{O}$ .

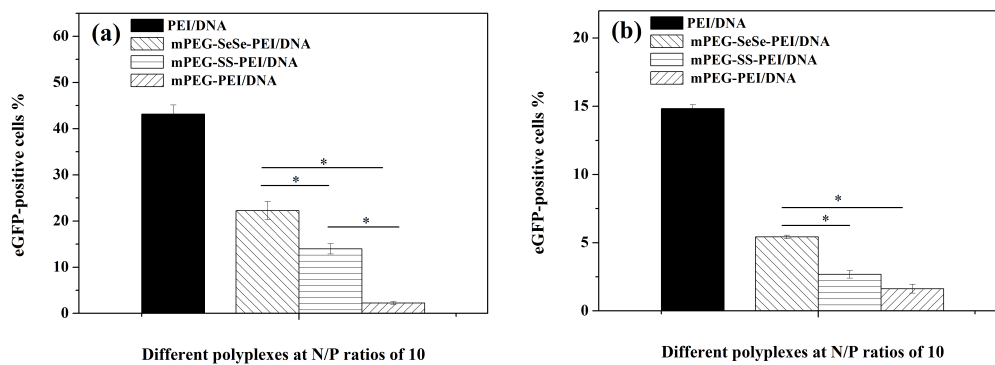

Fig. S3 Transfection efficiency of HEK293T (a) and HepG2 (b) cells exposed to different polyplexes/DNA polyplexes at N/P ratios of 10. \* $p < 0.05$
